# Supplementary material for: Synergetic effects of graphene–CoPc/silk fibroin three-dimensional porous composites as catalysts for acid red G degradation
Source: Royal Society of Chemistry journal article supplement (doi:10.1039/c9ra03162f), 2019-01-01
Supplement: c9ra03162f1.pdf [file c9ra03162f1.pdf]

## Synergetic effect of graphene-CoPc/SF three-dimensional porous composites as catalysts for acid red G degradation

Hui Ma, Huanxia Zhang, Dongsheng Wang, Mingqiong Tong, Jianda Cao, and Wen Wu\*

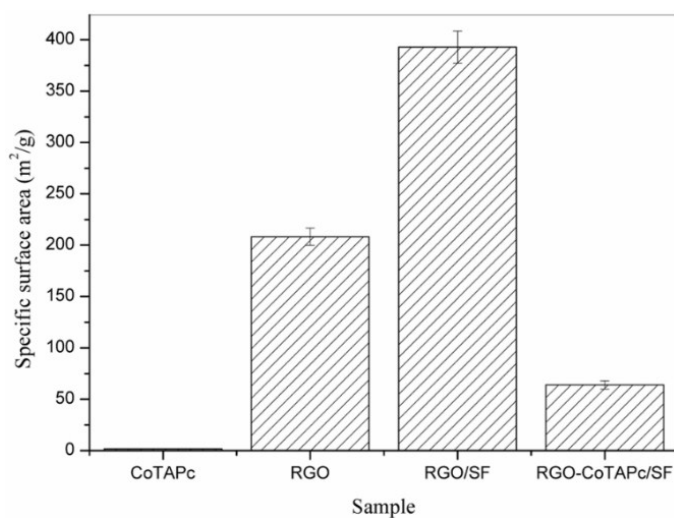

Fig. S1. BET of RGO, CoTAPc, RGO/SF and RGO-CoTAPc/SF.

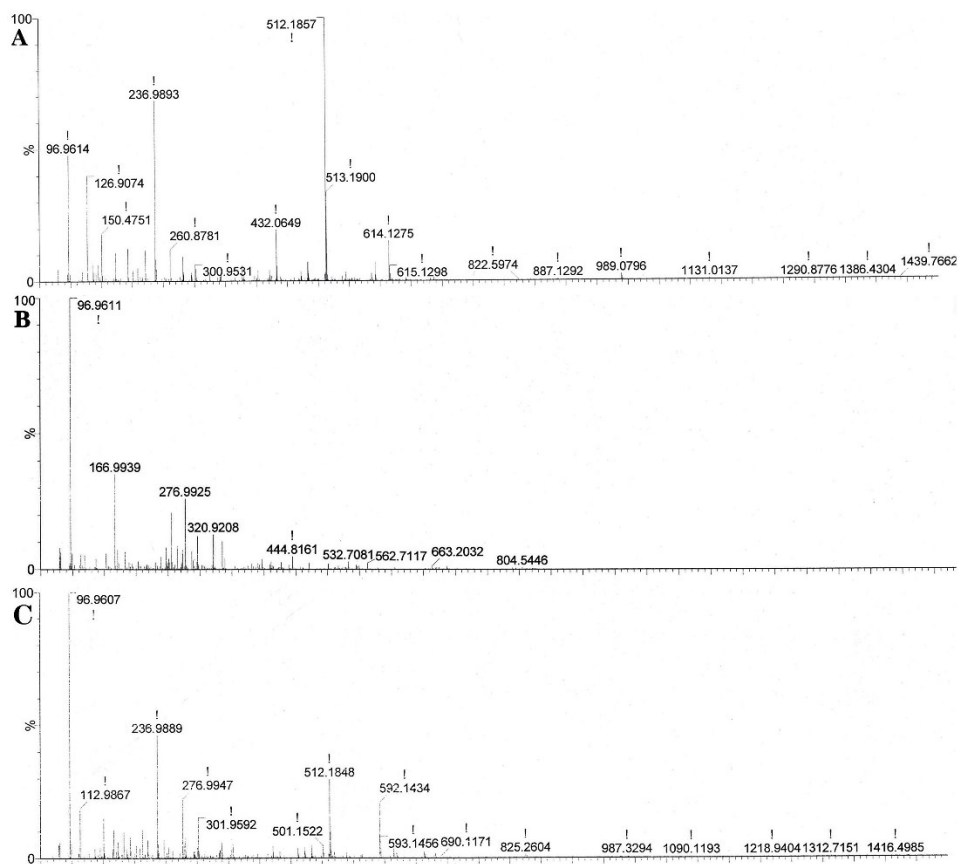

Fig. S2. MS profiles of the original ARG dye (A) , the oxidation products of ARG after 12 h (B) and 24 h (C).
